# Supplementary material for: Structure of a TRAPPII-Rab11 activation intermediate reveals GTPase substrate selection mechanisms
Source: PubMed Central journal article supplement (PMC9106297; doi:10.1126/sciadv.abn7446), 2022-05-13
Supplement: sciadv.abn7446_sm.pdf [file sciadv.abn7446_sm.pdf]

Supplementary Materials for  
**Structure of a TRAPPII-Rab11 activation intermediate reveals GTPase  
substrate selection mechanisms**

Saket R. Bagde and J. Christopher Fromme\*

\*Corresponding author. Email: jcf14@cornell.edu

Published 13 May 2022, *Sci. Adv.* **8**, eabn7446 (2022)  
DOI: 10.1126/sciadv.abn7446

**The PDF file includes:**

Figs. S1 to S10  
Tables S1 to S3  
Legend for movie S1  
References

**Other Supplementary Material for this manuscript includes the following:**

Movie S1

**A**

|                         | TRAPP <sup>II</sup> | TRAPP <sup>III</sup> |
|-------------------------|---------------------|----------------------|
| Catalytic core subunits | Bet5                | Bet5                 |
|                         | Trs20               | Trs20                |
|                         | Bet3                | Bet3                 |
|                         | Trs23               | Trs23                |
|                         | Trs31               | Trs31                |
|                         | Trs33               | Trs33                |
|                         | Tca17               | -                    |
|                         | Trs120              | -                    |
|                         | Trs130              | -                    |
|                         | Trs65               | -                    |
|                         | -                   | Trs85                |

**B**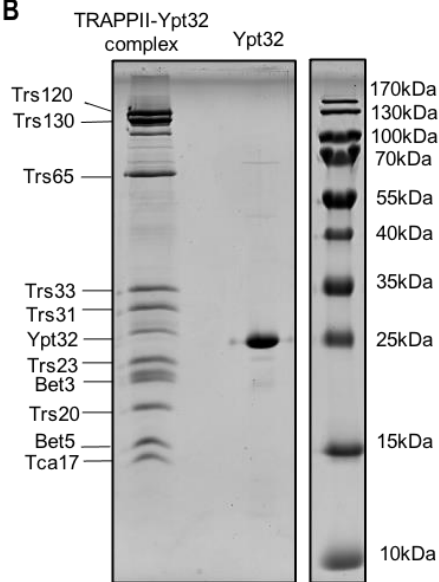**Fig. S1. CryoEM sample preparation.****(A)** Table detailing the subunit composition of the yeast TRAPP<sup>II</sup> and TRAPP<sup>III</sup> complexes.**(B)** SDS-PAGE gel showing purified TRAPP<sup>II</sup>-Rab11/Ypt32 complex and purified Rab11/Ypt32.

# TRAPP-II-Rab11/Ypt32 complex

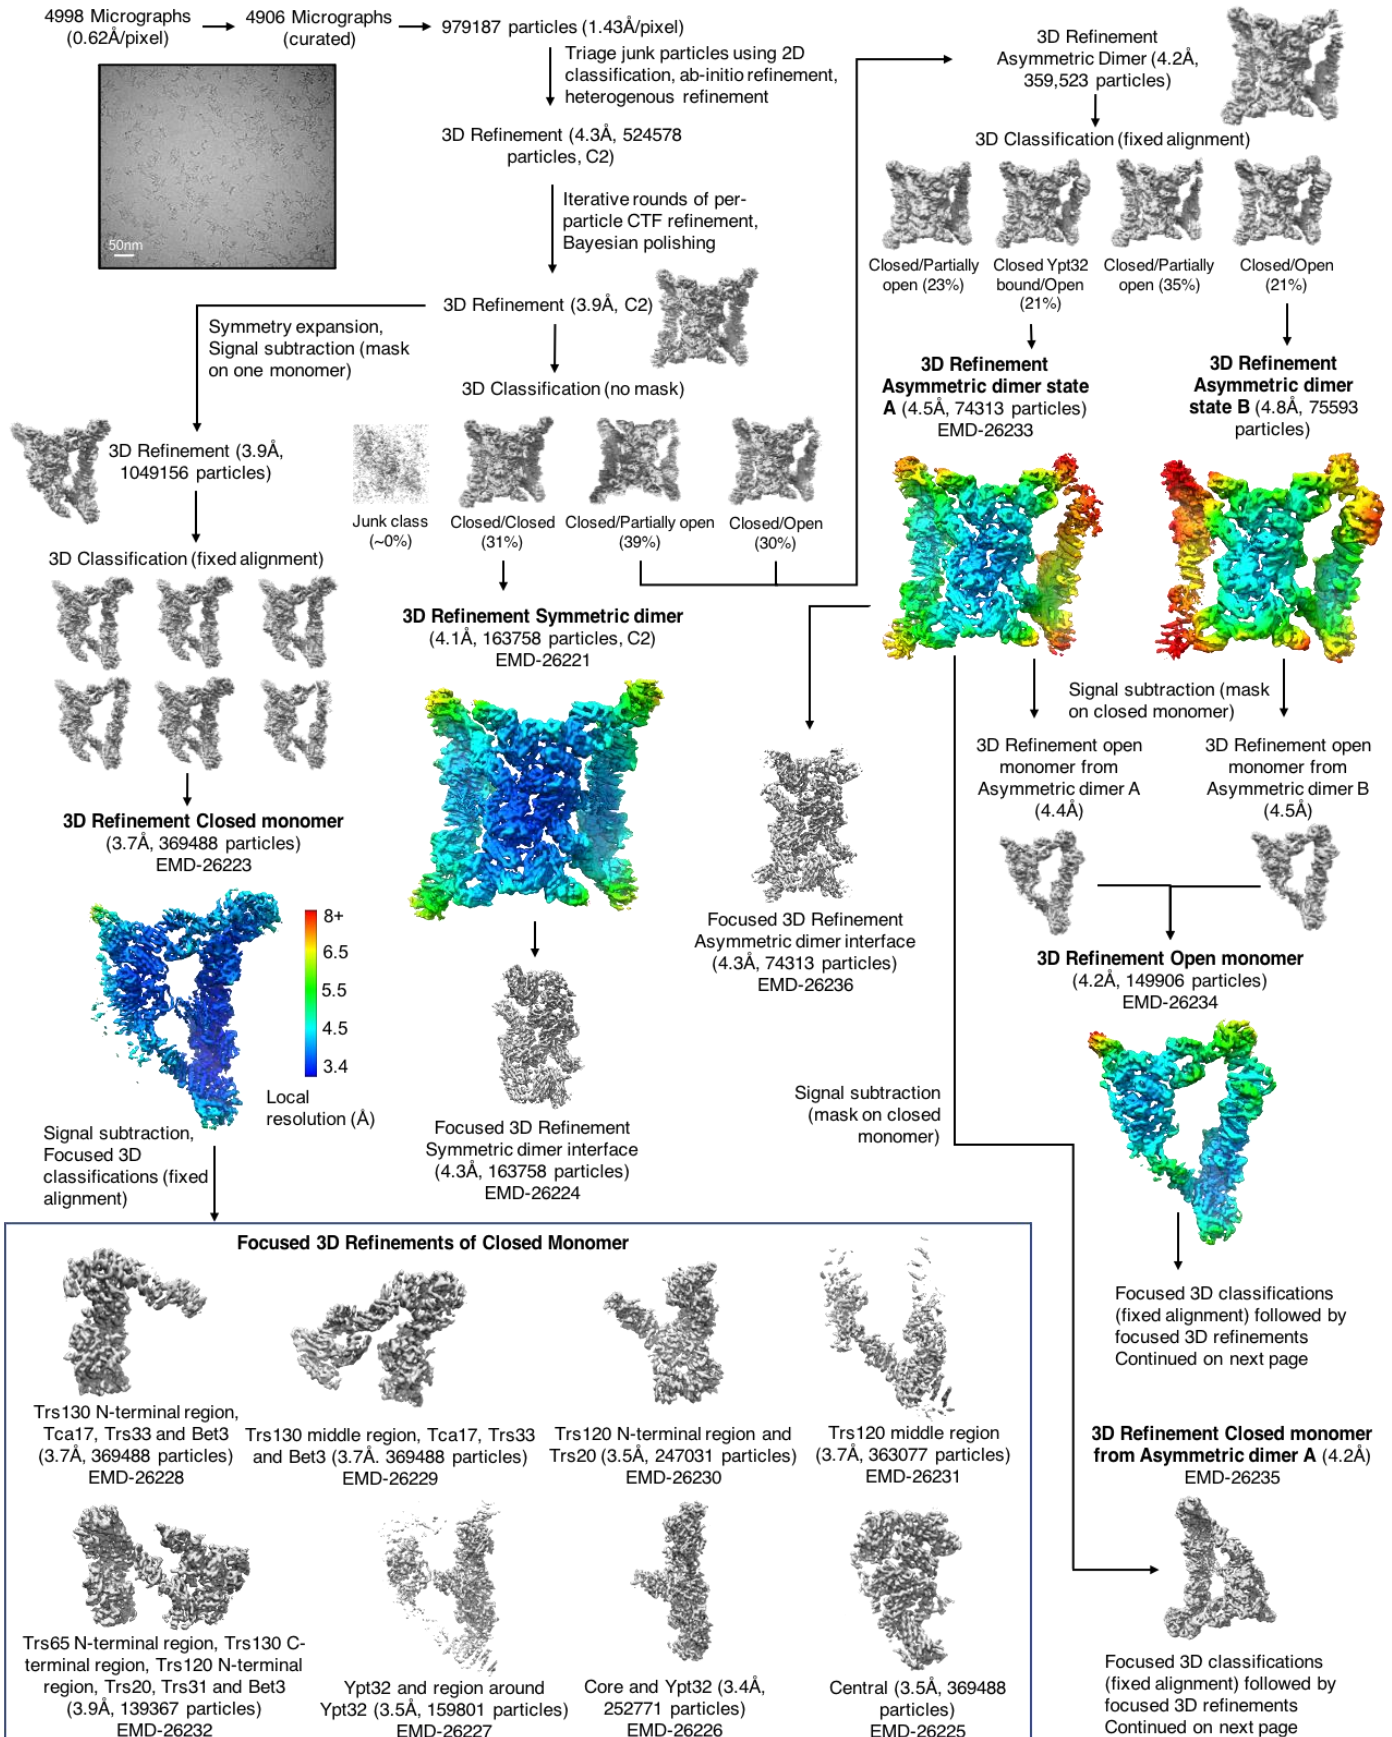

Continued from previous page

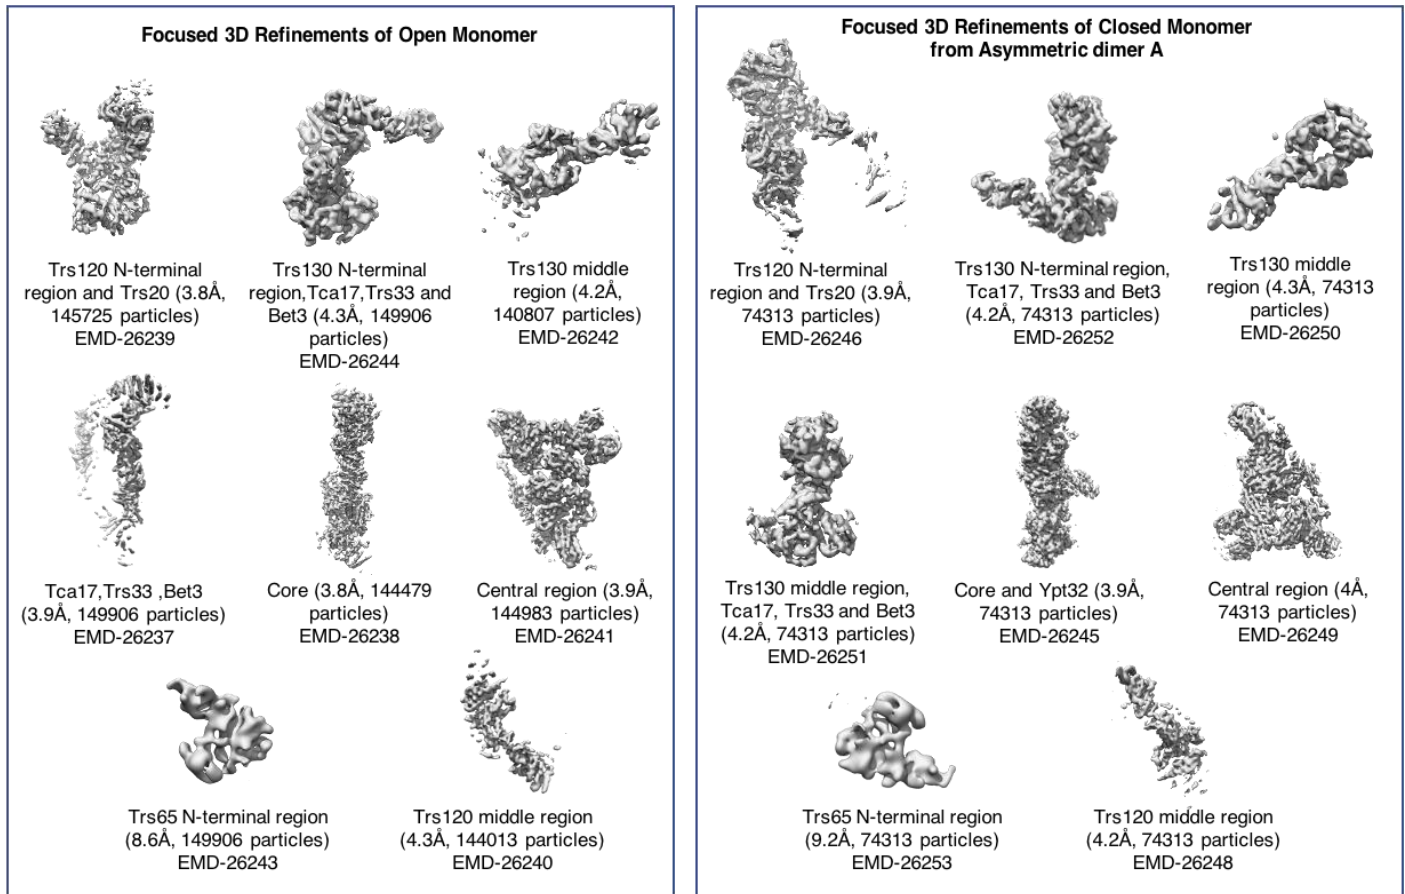

**Fig. S2. CryoEM data processing pipeline for TRAPP<sub>II</sub>-Rab11/Ypt32 complex.**

Flowchart illustrating the data processing strategy for the TRAPP<sub>II</sub>-Rab11/Ypt32 complex cryoEM data (see Methods).

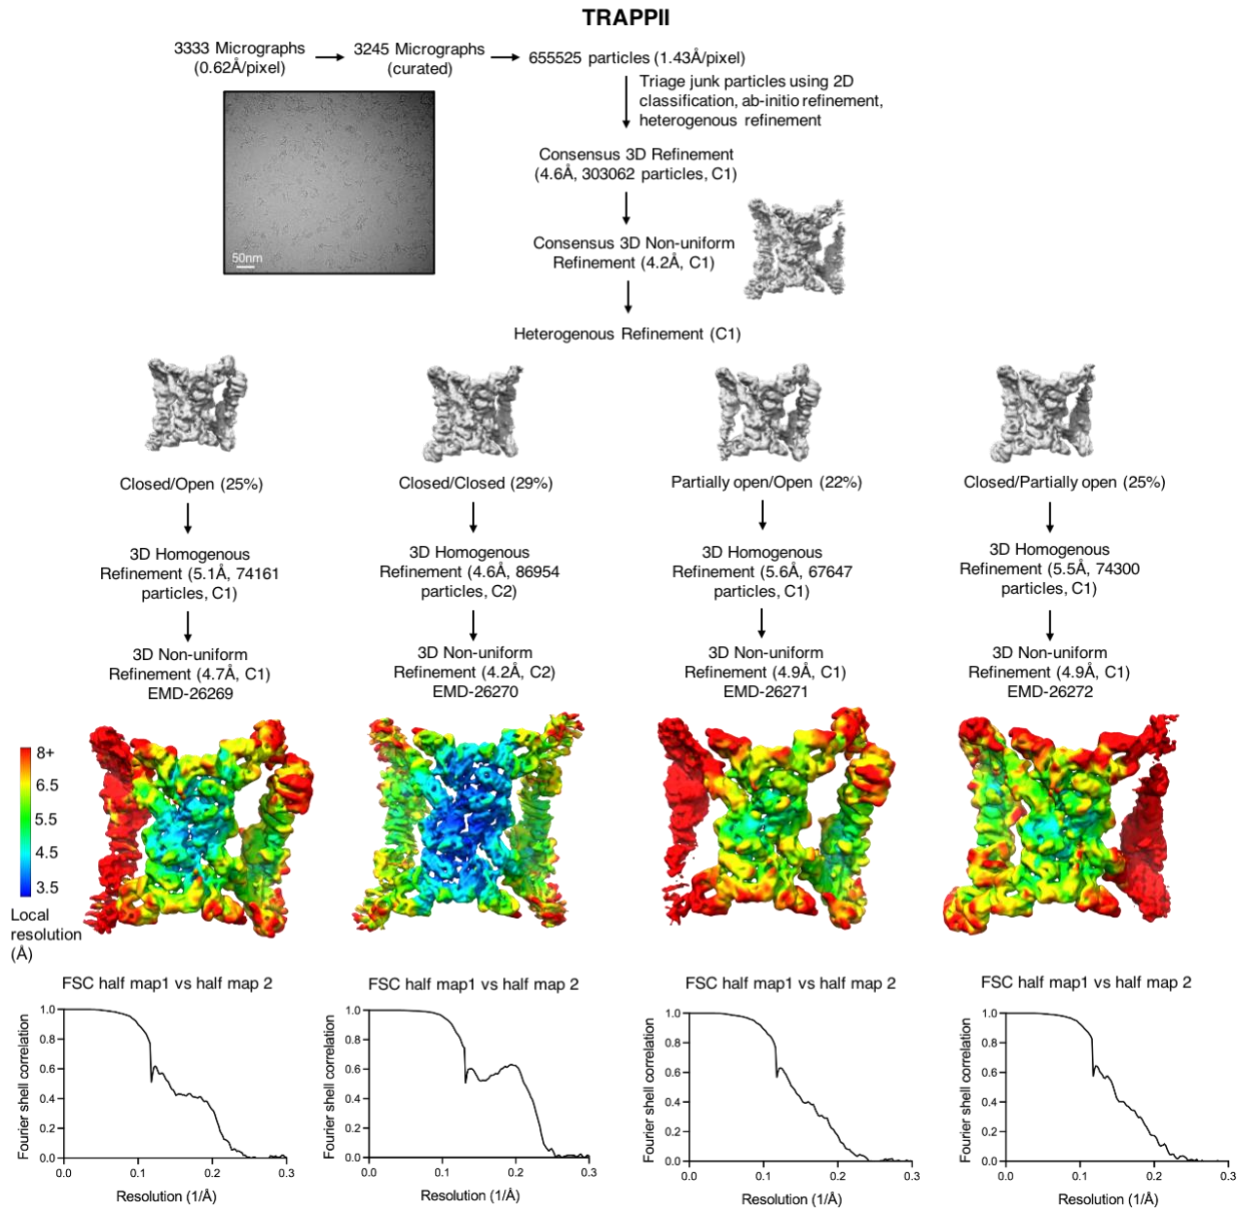

**Fig. S3. CryoEM data processing pipeline for TRAPP11.**

Flowchart illustrating the data processing strategy for the TRAPP11-only cryoEM data (see Methods). Fourier shell correlation plots for the indicated refinement reconstructions are shown below the maps.

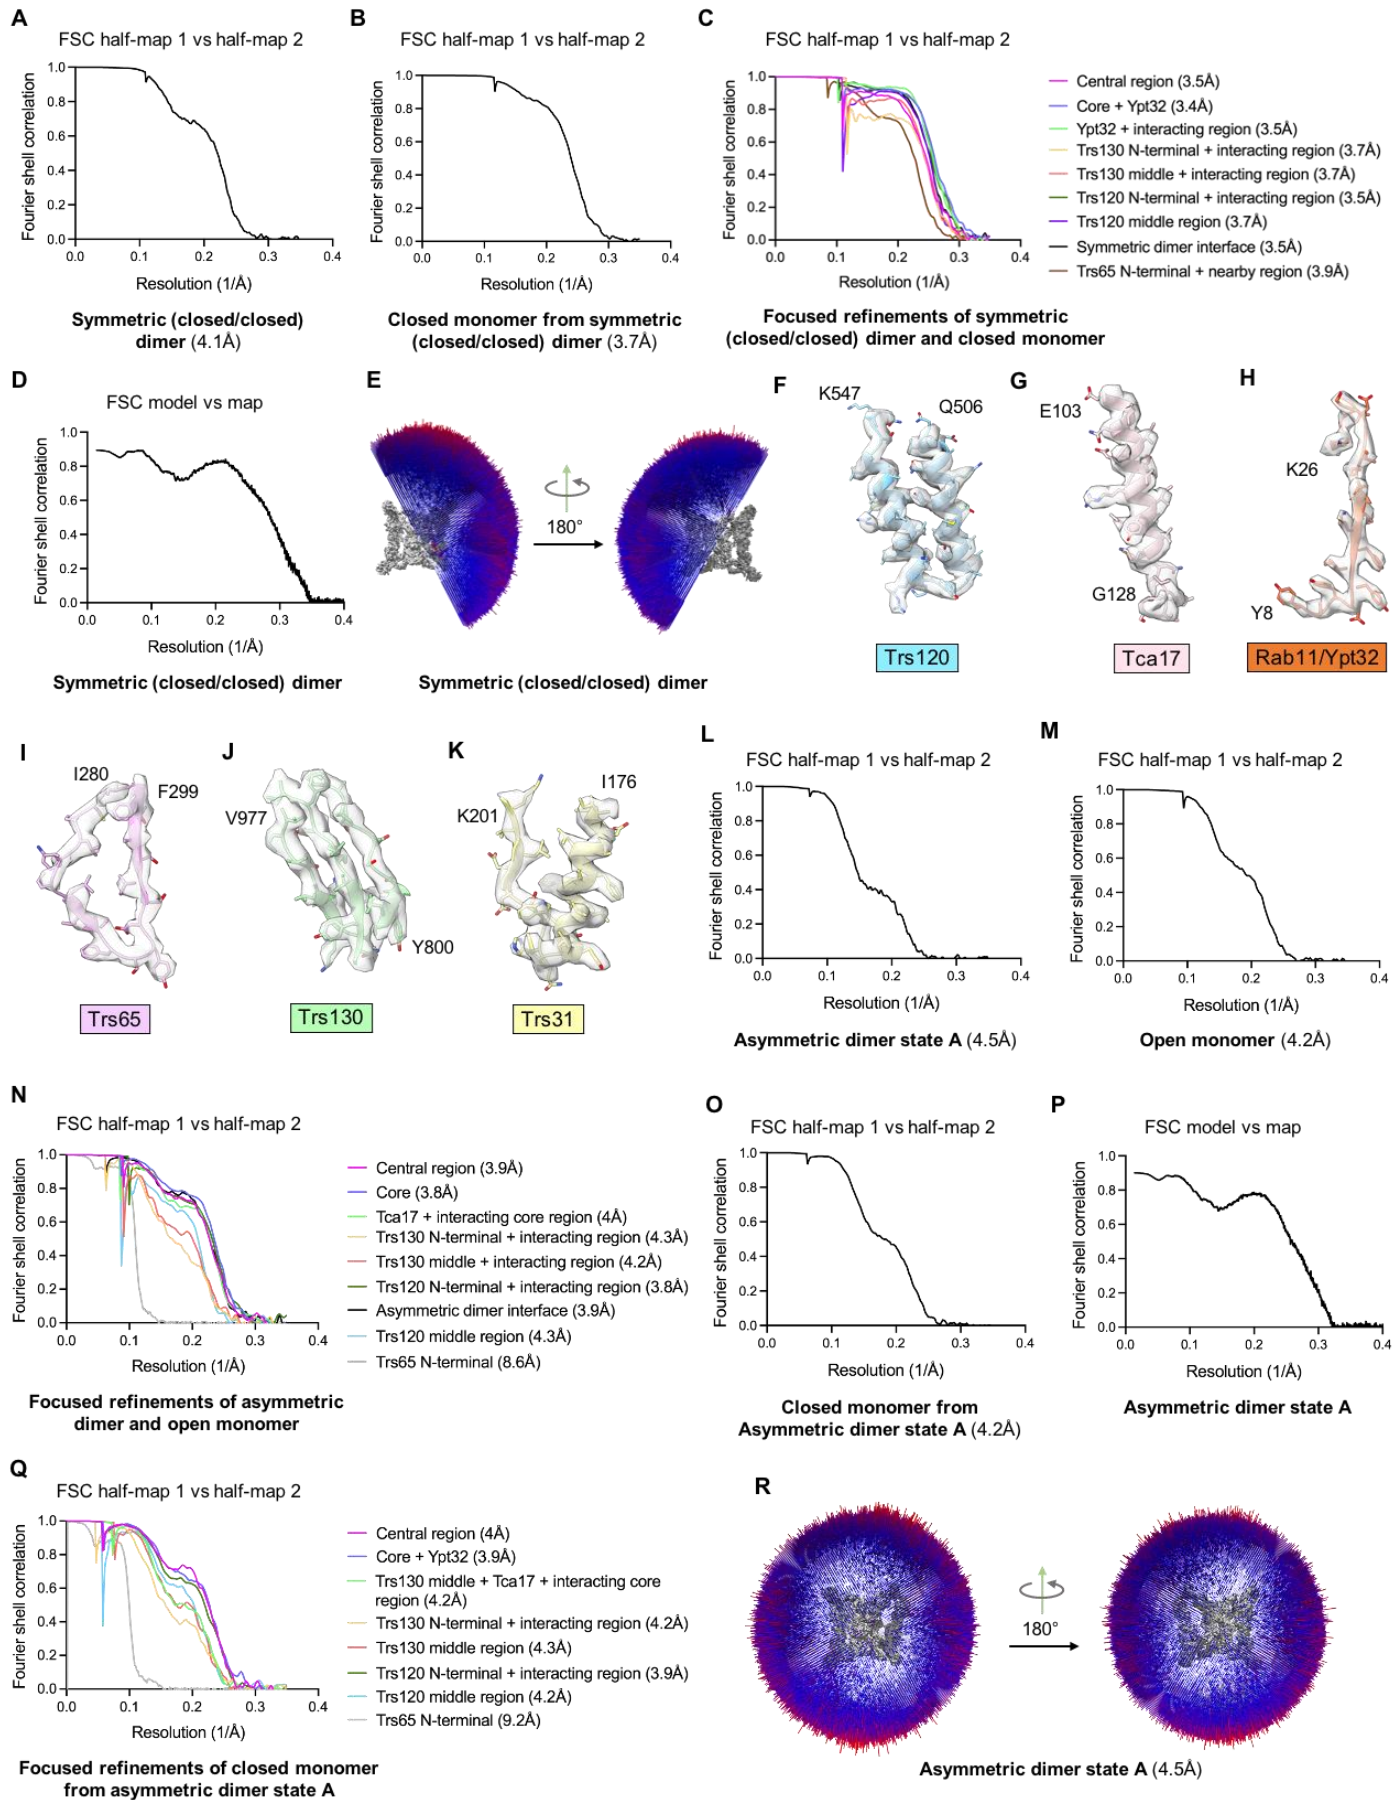

**Fig. S4. CryoEM map quality and model-map fit.**

(A) Fourier shell correlation plot for the symmetric (closed/closed) TRAPP<sub>II</sub>-Rab11/Ypt32 dimer reconstruction. (B) Fourier shell correlation plot for the symmetry-expanded TRAPP<sub>II</sub>-Rab11/Ypt32 closed monomer reconstruction. (C) Fourier shell correlation plots for the indicated focused refinement reconstructions produced from the symmetric (closed/closed) TRAPP<sub>II</sub>-Rab11/Ypt32 complex. (D) Fourier shell correlation plot comparing the refined symmetric (closed/closed) TRAPP<sub>II</sub>-Rab11/Ypt32 dimer model to the symmetric (closed/closed) TRAPP<sub>II</sub>-Rab11/Ypt32 dimer reconstruction. (E) Orientation histogram for the symmetric (closed/closed) TRAPP<sub>II</sub>-Rab11/Ypt32 dimer particle refinement. (F) Example cryoEM density for the Trs120 subunit. (G) Example cryoEM density for the Tca17 subunit. (H) Example cryoEM density for Rab11/Ypt32. (I) Example cryoEM density for the Trs65 subunit. (J) Example cryoEM density for the Trs130 subunit. (K) Example cryoEM density for the Trs31 subunit (as an example of the core complex). (L) Fourier shell correlation plot for the asymmetric (closed/open) dimer “state A” reconstruction. (M) Fourier shell correlation plot for the open TRAPP<sub>II</sub> monomer reconstruction. (N) Fourier shell correlation plots for the indicated focused refinement reconstructions produced from the open monomer. (O) Fourier shell correlation plot for the closed TRAPP<sub>II</sub> monomer reconstruction from the asymmetric (closed/open) dimer “state A”. (P) Fourier shell correlation plot comparing the refined symmetric asymmetric dimer model to the asymmetric dimer reconstruction. (Q) Fourier shell correlation plots for the indicated focused refinement reconstructions produced from the closed monomer of the asymmetric (closed/open) dimer “state A”. (R) Orientation histogram for the asymmetric dimer “state A” particle refinement.

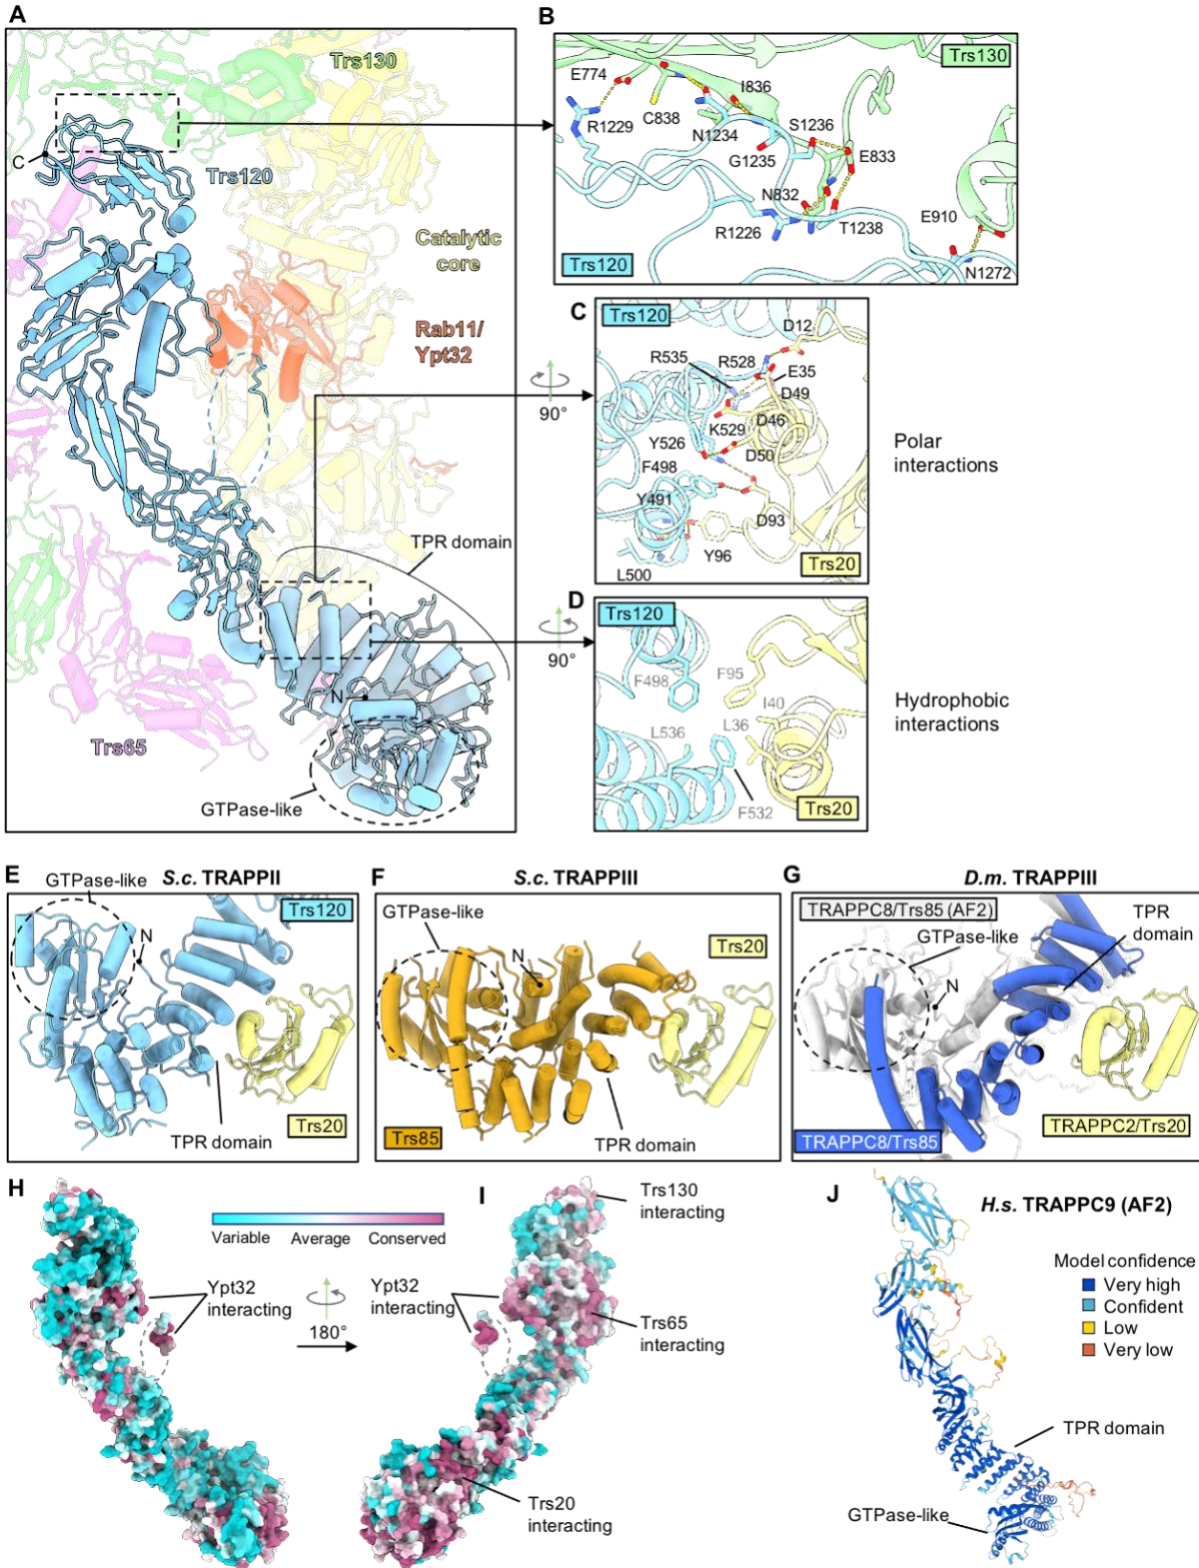

**Fig. S5. Analysis of Trs120 structure and interactions within the TRAPPII complex.**

(A) Overall fold of Trs120. TPR : tetratricopeptide repeat. (B) Interactions at the Trs120-Trs130 interface. (C) Polar interactions at the Trs120-Trs20 interface. (D) Hydrophobic interactions at the



Trs120-Trs20 interface. **(E-G)** Comparison of Trs120-Trs20 in TRAPP<sub>II</sub> (E, this work), Trs85-Trs20 in yeast TRAPP<sub>III</sub> (25) (F), and TRAPPC8-TRAPPC2 in fly TRAPP<sub>III</sub> (26) (G) interfaces. Note that the GTPase-like domain of TRAPPC8 was not modeled in the published fly TRAPP<sub>III</sub> structure, so we superimposed the AlphaFold prediction (53) (shown in gray) onto the fly TRAPPC8 experimental model (26). **(H,I)** Conservation analysis of Trs120. **(J)** AlphaFold prediction of the human TRAPPC9 structure (53) shows an overall fold similar to that of Trs120.

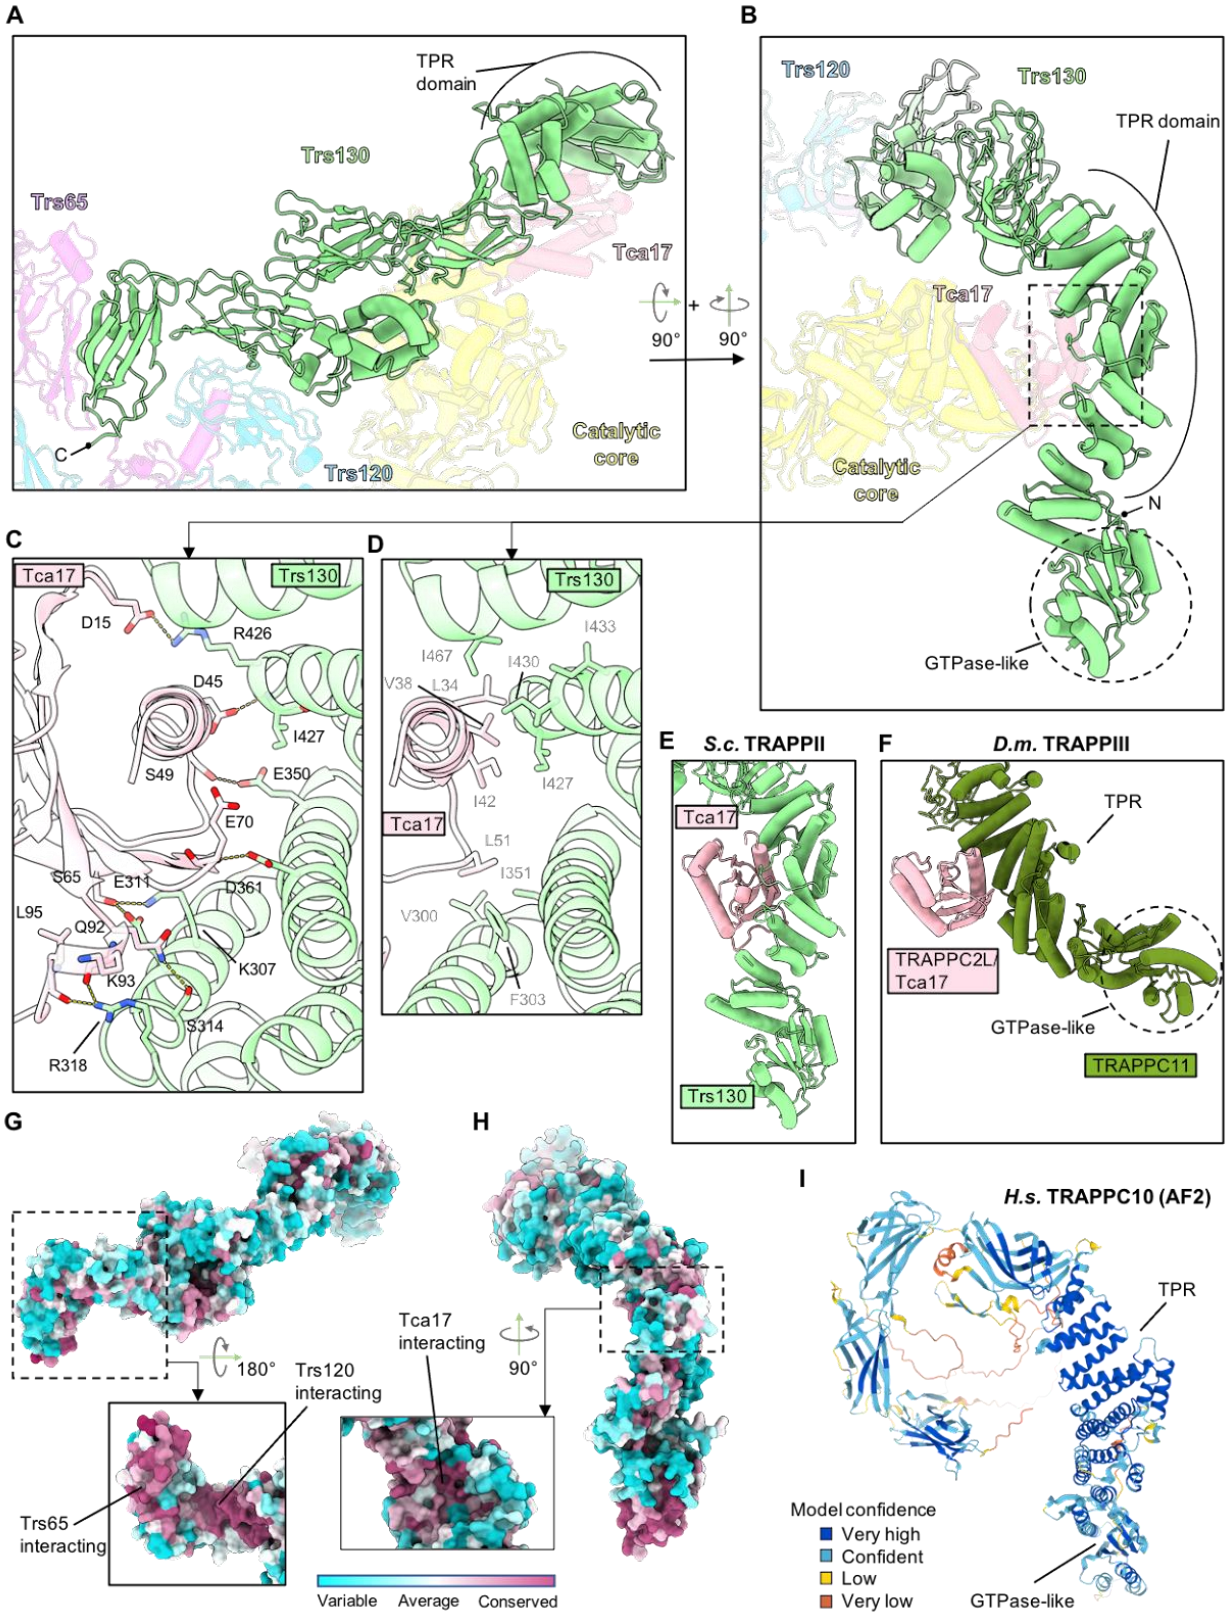

**Fig. S6. Analysis of Trs130 structure and interactions within the TRAPP<sup>II</sup> complex.**

(**A,B**) Overall fold of Trs130. TPR : tetratricopeptide repeat. (**C**) Polar interactions at the Trs130-Tca17 interface. Tca17 residue D45 is equivalent to a mutation in human TRAPPC2L associated with a neurodevelopmental disorder (36) (**D**) Hydrophobic interactions at the Trs130-Tca17 interface. (**E,F**) Comparison of the leg elements from Trs130 (E, this work) and TRAPPC11 from fly TRAPPIII (26) (F). Note that the leg of TRAPPC11 from fly TRAPPIII appears “bent” relative to the “straight” leg of Trs130. (**G,H**) Conservation analysis of Trs130. (**I**) AlphaFold structure prediction (53) of the human TRAPP<sup>II</sup> subunit TRAPPC10 (Trs130 paralog) shows an overall fold similar to that of Trs130. Note that the TRAPPC10 leg appears “straight”, similar to the structure of yeast Trs130 but unlike the corresponding region of TRAPPC11 which appears “bent” in fly TRAPPIII.

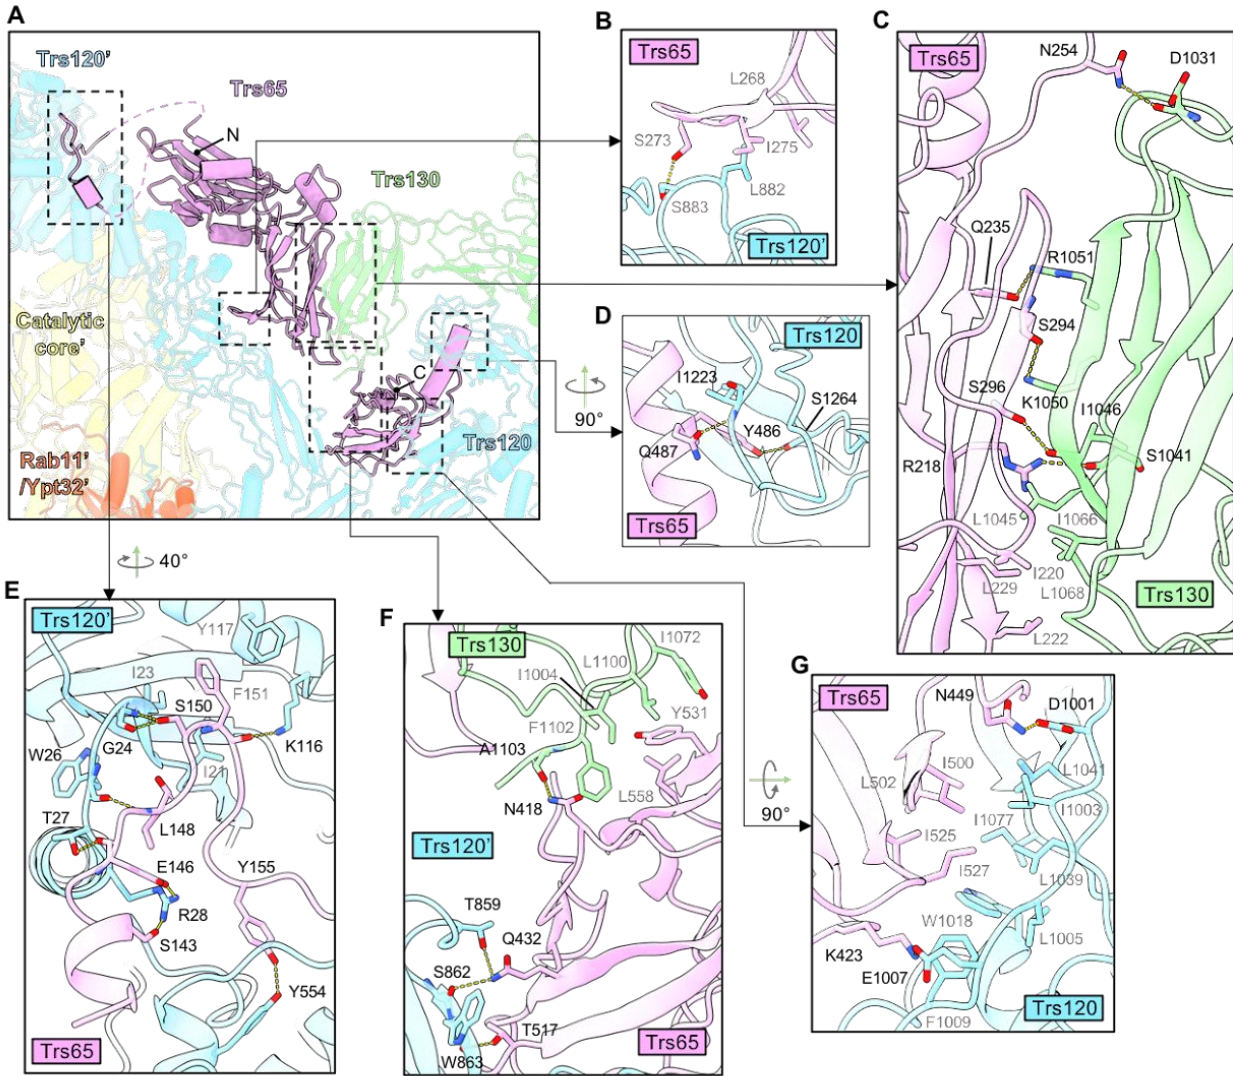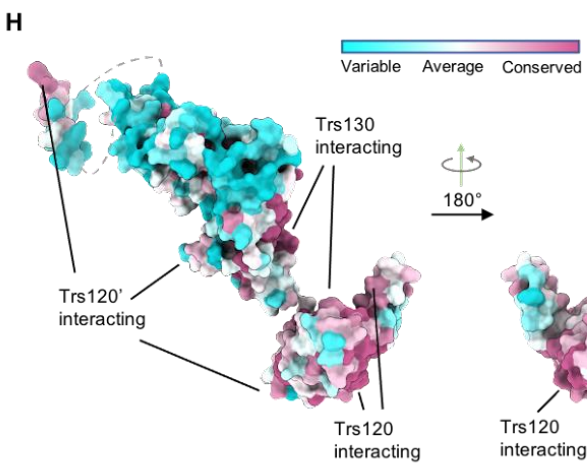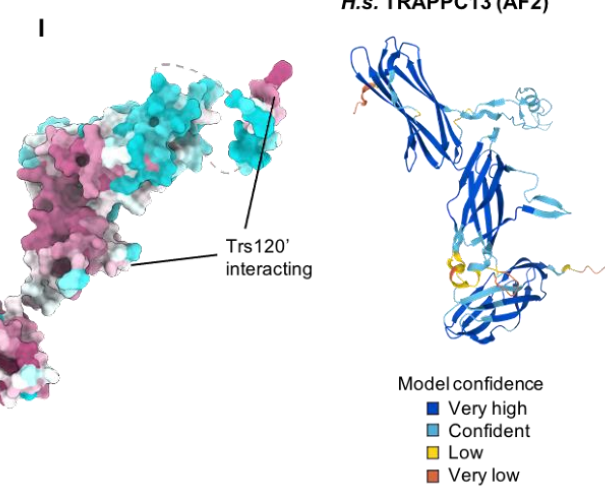

**Fig. S7. Analysis of Trs65 structure and interactions within the TRAPP<sup>II</sup> complex.**

(A) Overall fold of Trs65. Labels with prime (') symbols indicate subunits belonging to the other monomer within the TRAPP<sup>II</sup> dimer. (B-G) Interactions between Trs65 and other subunits. (H,I) Conservation analysis of Trs65. (J) AlphaFold structure prediction (53) of human TRAPPC13 shows an overall fold similar to that of Trs65. Note that although it exhibits structural similarity to Trs65, TRAPPC13 is part of the metazoan TRAPP<sup>III</sup> complex (30, 40).

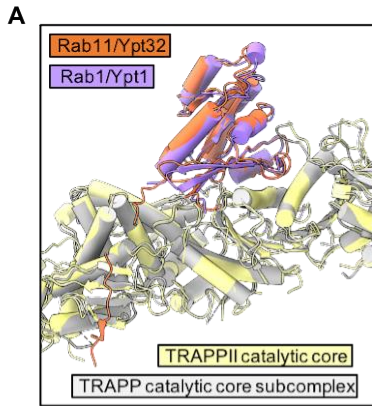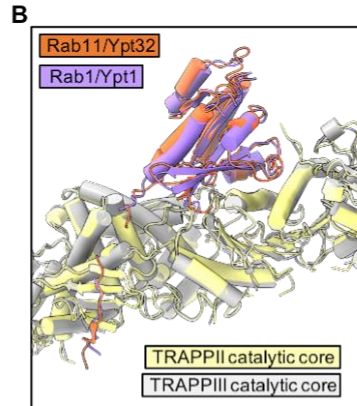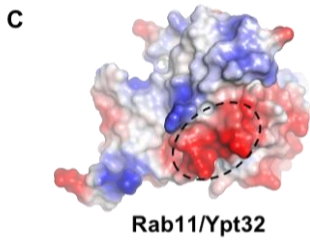

**D**

|                    |     |        |     |
|--------------------|-----|--------|-----|
| <i>S.c.</i> Ypt32  | 112 | RENADD | 117 |
| <i>S.c.</i> Ypt31  | 112 | RENADD | 117 |
| <i>D.m.</i> Rab11a | 110 | RDHADQ | 115 |
| <i>D.r.</i> Rab11a | 110 | RDHADS | 115 |
| <i>X.t.</i> Rab11a | 110 | RDHADN | 115 |
| <i>M.m.</i> Rab11a | 110 | RDHADS | 115 |
| <i>H.s.</i> Rab11a | 110 | RDHADS | 115 |

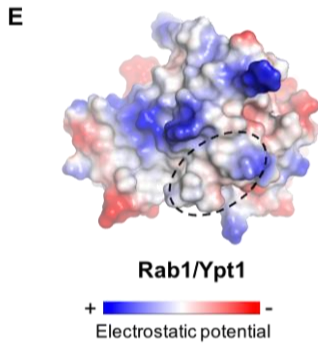

**F**

|                   |     |        |     |
|-------------------|-----|--------|-----|
| <i>S.c.</i> Ypt1  | 107 | DRYATS | 112 |
| <i>D.m.</i> Rab1a | 110 | ERYACE | 115 |
| <i>D.r.</i> Rab1a | 107 | DRYASE | 112 |
| <i>X.t.</i> Rab1a | 110 | DRYASE | 115 |
| <i>M.m.</i> Rab1a | 110 | DRYASE | 115 |
| <i>H.s.</i> Rab1a | 110 | DRYASE | 115 |

**G**

|                    |     |        |     |
|--------------------|-----|--------|-----|
| Ypt31-Ypt1 chimera | 112 | DRYATS | 117 |
|--------------------|-----|--------|-----|

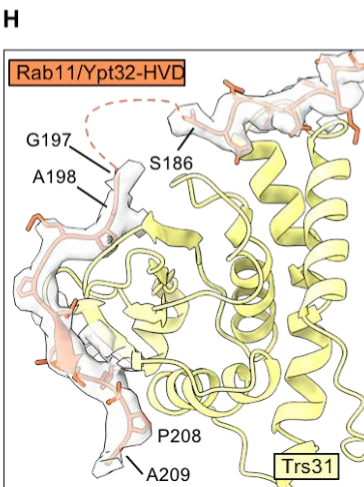

**I**

|                    |     |                            |                     |     |     |
|--------------------|-----|----------------------------|---------------------|-----|-----|
| <i>S.c.</i> Ypt32  | 186 | SGSGTN-NMGSNGAPKGP         | ISLTPAPKEDKKKKSSNCC | --- | 222 |
| <i>S.c.</i> Ypt31  | 186 | GDSSANGNANGASAPNGPT        | ISLTPPTPENKKANGNNCC | --- | 223 |
| <i>D.m.</i> Rab11a | 184 | PPEGDVIRP-----SNVEPIDVKPTV | ---TADVRKQCCQ       | --  | 214 |
| <i>D.r.</i> Rab11a | 184 | RRDNDMSPS-----NNVVSIVVQPT  | ---ENKPKMQCCQSI     |     | 215 |
| <i>X.t.</i> Rab11a | 184 | RRENDMSPS-----NNVVPVHVPPTT | ---ENKPKMQCCQNI     |     | 216 |
| <i>M.m.</i> Rab11a | 184 | RRENDMSPS-----NNVVPVHVPPTT | ---ENKPKVQCCQNI     |     | 216 |
| <i>H.s.</i> Rab11a | 184 | RRENDMSPS-----NNVVPVHVPPTT | ---ENKPKVQCCQNI     |     | 216 |

  

|                   |     |                        |       |     |
|-------------------|-----|------------------------|-------|-----|
| <i>S.c.</i> Ypt1  | 181 | TTQKKEDKGNVNLKGGSLTNT  | GGGCC | 206 |
| <i>D.m.</i> Rab1a | 184 | ----DNASKVKIDQGRPVENTK | SGCC  | 205 |
| <i>D.r.</i> Rab1a | 181 | ----GSE-KTKIESTPVKPA   | SGGCC | 201 |
| <i>X.t.</i> Rab1a | 184 | ----GQE-KNVKIQSTPVKQSS | GGCC  | 204 |
| <i>M.m.</i> Rab1a | 184 | ----GAEKSNVKIQSTPVKQSS | GGCC  | 205 |
| <i>H.s.</i> Rab1a | 184 | ----GAEKSNVKIQSTPVKQSS | GGCC  | 205 |

Trs31 binding region of Ypt32 and Ypt1 HVD

CIM motif

**Fig. S8. Differences between Rab1 and Rab11 TRAPP core binding interactions.**

(A) Superposition comparing the structure of TRAPP<sup>II</sup>-bound Rab11/Ypt32 (this study) to TRAPP core-bound Rab1/Ypt1 (22). (B) Superposition comparing the structure of TRAPP<sup>II</sup>-bound Rab11/Ypt32 (this study) to TRAPP<sup>III</sup> bound Rab1/Ypt1 (25). (C-F) Comparison of the surfaces of Rab11/Ypt32 and Rab1/Ypt1 to highlight the electrostatic differences (C,E) of sequences (D,F) located near the TRAPP-core binding site of each Rab. (G) Sequence of the region used in the Ypt31-Ypt1 graft chimera construct used for experiments shown in Fig. 2, F and G. (H) Close-up of the interaction between the Rab11/Ypt32 HVD (orange) and the Trs31 core subunit in TRAPP<sup>II</sup> (yellow). CryoEM density of the HVD is shown in white with black outline. (I) Alignments of the Rab1 and Rab11 HVD regions are aligned to each other using the Rab1/Ypt1 and Rab11/Ypt32 binding-sites on Trs31 (blue line) as a structural alignment reference. The CIM motifs required for prenylation are indicated.

**A**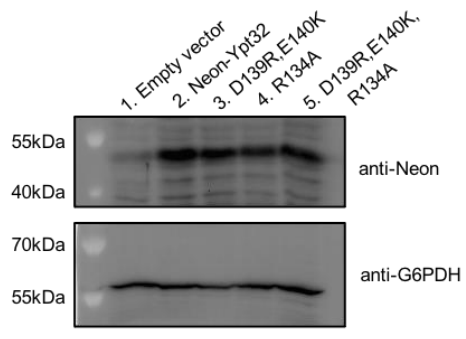**B**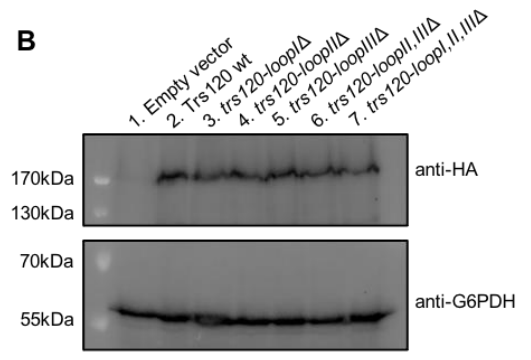**C**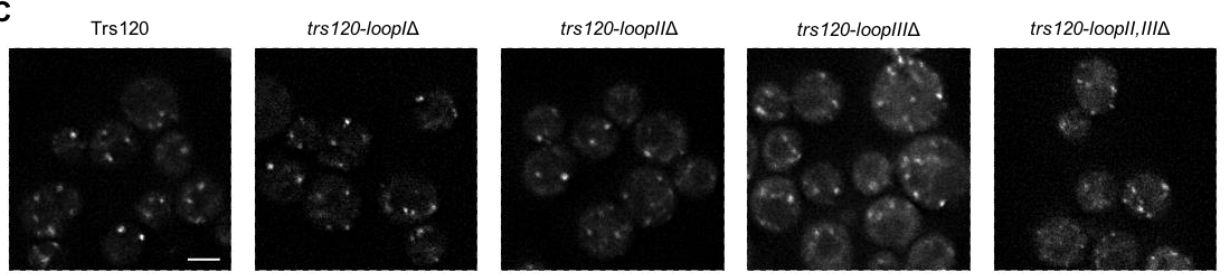**D**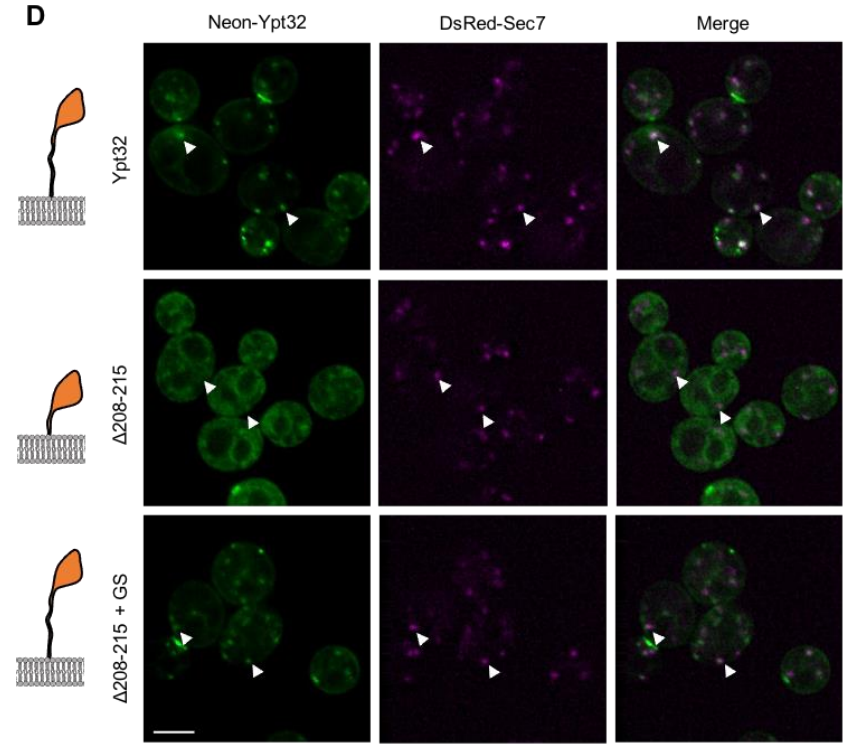



**Fig. S9. Western blot analysis of Rab11/Ypt32 mutants and localization of Trs120 and Rab11/Ypt32 mutants.**

(A) Immunoblot to confirm expression of the mutants shown in Fig. 3E. (B) Immunoblot to confirm expression of the HA-tagged Trs120 and loop mutants shown in Fig. 3F. (C) Imaging data using Trs120-mNeonGreen constructs indicating that the Trs120 loop deletion constructs are expressed and localized similar to the wild-type. (D) Localization of an extra copy of wild-type and mutant mNeonGreen-Rab11/Ypt32 constructs in yeast. Colocalization with Sec7-marked late-Golgi compartments is indicative of active Rab11/Ypt32. Scale bars shown in (C) and (D) are 2 $\mu$ m.

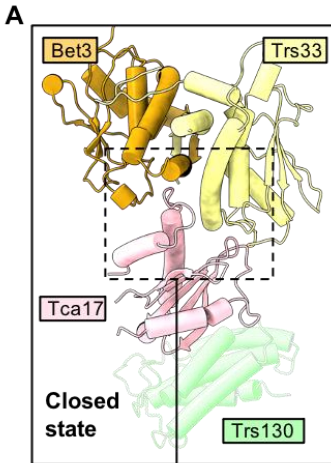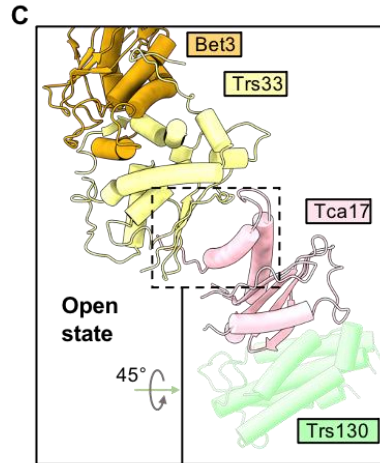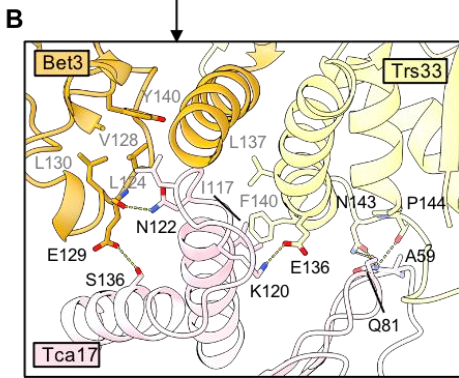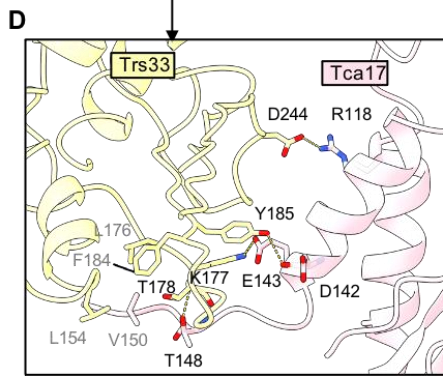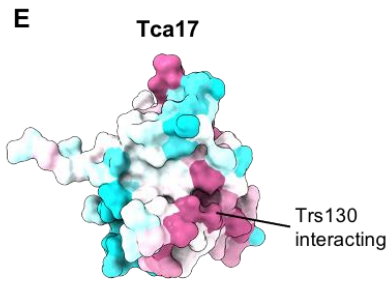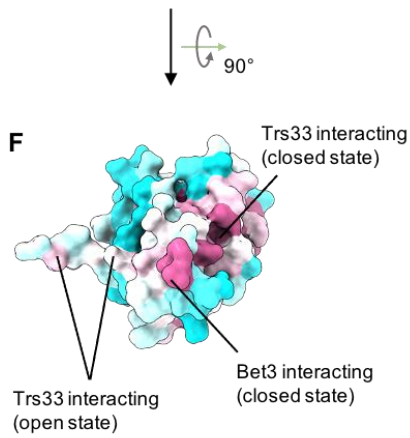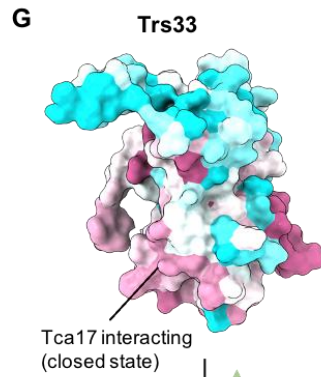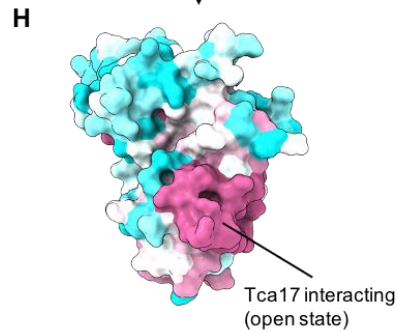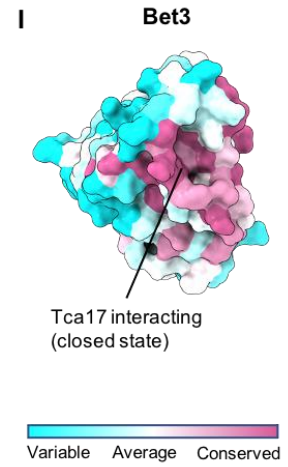

**Fig. S10. Distinct interactions between Tca17 and the core in the open and closed states.**

(**A,B**) Close-up view of the interactions between Tca17 and the core subunits Trs33 and Bet3 in the closed state. (**C,D**) Close-up view of the interactions between Tca17 and Trs33 in the open state. Note that Trs33 F184 corresponds to the residue position of a substitution mutation in human TRAPPC6A that is associated with a neurodevelopmental syndrome (39) (the disease allele results in a TRAPPC6A Y93N substitution according to the UNIPROT database sequence of the human protein). (**E,F**) Conservation analysis of Tca17, indicating the interaction sites. (**G,H**) Conservation analysis of Trs33. (**I**) Conservation analysis of Bet3.

**Table S1. CryoEM data collection and model validation statistics for TRAPP11-Rab11/Ypt32 complex.**

|                                             | Closed/closed state                                          |                                             |                            | Closed/open state                                                     |                                                      |                          |                                                          |
|---------------------------------------------|--------------------------------------------------------------|---------------------------------------------|----------------------------|-----------------------------------------------------------------------|------------------------------------------------------|--------------------------|----------------------------------------------------------|
|                                             | Symmetric dimer (composite structure) (EMD-26254) (PDB 7U05) | Symmetric dimer (consensus map) (EMD-26221) | Closed monomer (EMD-26223) | Asymmetric dimer state A (composite structure) (EMD-26255) (PDB 7U06) | Asymmetric dimer state A (consensus map) (EMD-26233) | Open monomer (EMD-26234) | Closed monomer from asymmetric dimer state A (EMD-26235) |
| Data collection and processing              |                                                              |                                             |                            |                                                                       |                                                      |                          |                                                          |
| Magnification                               | 63000                                                        |                                             |                            |                                                                       |                                                      |                          |                                                          |
| Voltage (kV)                                | 200                                                          |                                             |                            |                                                                       |                                                      |                          |                                                          |
| Electron exposure (e-/Å <sup>2</sup> )      | 53.2                                                         |                                             |                            |                                                                       |                                                      |                          |                                                          |
| Defocus range (µm)                          | -0.8 to -2.5                                                 |                                             |                            |                                                                       |                                                      |                          |                                                          |
| Pixel size (Å)                              | 1.24                                                         |                                             |                            |                                                                       |                                                      |                          |                                                          |
| Total number of movies                      | 4998                                                         |                                             |                            |                                                                       |                                                      |                          |                                                          |
| Symmetry imposed                            | C2                                                           | C2                                          | C1                         | C1                                                                    | C1                                                   | C1                       | C1                                                       |
| Initial particle images (no.)               | 524,578                                                      | 524,578                                     | 524,578                    | 524,578                                                               | 524,578                                              | 524,578                  | 524,578                                                  |
| Final particle images (no.)                 | NA                                                           | 163,758                                     | 369,488                    | NA                                                                    | 74,313                                               | 149,906                  | 74,313                                                   |
| Map resolution (Å)<br>FSC threshold (0.143) | NA                                                           | 4.1                                         | 3.7                        | NA                                                                    | 4.5                                                  | 4.2                      | 4.2                                                      |
| Map resolution range (Å)                    | NA                                                           | 3.7 - 12.9                                  | 3.5 - 9.7                  | NA                                                                    | 4 - 15.1                                             | 4 - 10.7                 | 4 - 11.5                                                 |
|                                             |                                                              |                                             |                            |                                                                       |                                                      |                          |                                                          |
| Refinement                                  |                                                              |                                             |                            |                                                                       |                                                      |                          |                                                          |
| Initial model used (PDB code)               | 3CUE, 3RWO, 3PR6                                             |                                             |                            | 3CUE, 3RWO, 3PR6                                                      |                                                      |                          |                                                          |
| Model resolution (Å)<br>FSC threshold (0.5) | 3.5                                                          |                                             |                            | 3.8                                                                   |                                                      |                          |                                                          |

|                                                    |        |     |     |        |     |     |     |
|----------------------------------------------------|--------|-----|-----|--------|-----|-----|-----|
| <b>Map sharpening<br/>B factor (Å<sup>2</sup>)</b> | NA     | -94 | -81 | NA     | -92 | -77 | -87 |
| <b>Model composition</b>                           |        |     |     |        |     |     |     |
| <b>Non-hydrogen atoms</b>                          | 65,598 |     |     | 63,860 |     |     |     |
| <b>Protein residues</b>                            | 8,350  |     |     | 8,151  |     |     |     |
| <b>Ligands</b>                                     | PLM: 4 |     |     | PLM: 4 |     |     |     |
| <b>B factors (Å<sup>2</sup>)</b>                   |        |     |     |        |     |     |     |
| <b>Protein</b>                                     | 104.00 |     |     | 109.33 |     |     |     |
| <b>Ligand</b>                                      | 92.49  |     |     | 92.93  |     |     |     |
| <b>R.m.s. deviations</b>                           |        |     |     |        |     |     |     |
| <b>Bond lengths (Å)</b>                            | 0.004  |     |     | 0.004  |     |     |     |
| <b>Bond angles (°)</b>                             | 0.818  |     |     | 0.824  |     |     |     |
| <b>Validation</b>                                  |        |     |     |        |     |     |     |
| <b>MolProbity score</b>                            | 1.74   |     |     | 1.80   |     |     |     |
| <b>Clashscore</b>                                  | 4.22   |     |     | 4.95   |     |     |     |
| <b>Poor rotamers (%)</b>                           | 0.06   |     |     | 0.03   |     |     |     |
| <b>Ramachandran plot</b>                           |        |     |     |        |     |     |     |
| <b>Favored (%)</b>                                 | 90.61  |     |     | 90.28  |     |     |     |
| <b>Allowed (%)</b>                                 | 9.28   |     |     | 9.57   |     |     |     |
| <b>Disallowed (%)</b>                              | 0.11   |     |     | 0.15   |     |     |     |

**Table S2. CryoEM data collection and map statistics for TRAPP11-only complex.**

|                                                         | Closed/open state<br>(consensus map)<br>(EMD-26269) | Closed/closed state<br>(consensus map)<br>(EMD-26270) | Partially open/open<br>state (consensus<br>map)<br>(EMD-26271) | Closed/Partially open<br>(consensus map)<br>(EMD-26272) |
|---------------------------------------------------------|-----------------------------------------------------|-------------------------------------------------------|----------------------------------------------------------------|---------------------------------------------------------|
| <b>Data collection and processing</b>                   |                                                     |                                                       |                                                                |                                                         |
| <b>Magnification</b>                                    | 63000                                               |                                                       |                                                                |                                                         |
| <b>Voltage (kV)</b>                                     | 200                                                 |                                                       |                                                                |                                                         |
| <b>Electron exposure<br/>(e-/Å<sup>2</sup>)</b>         | 54                                                  |                                                       |                                                                |                                                         |
| <b>Defocus range (µm)</b>                               | -0.8 to -2.5                                        |                                                       |                                                                |                                                         |
| <b>Pixel size (Å)</b>                                   | 1.24                                                |                                                       |                                                                |                                                         |
| <b>Total number of movies</b>                           | 3333                                                |                                                       |                                                                |                                                         |
| <b>Symmetry imposed</b>                                 | C1                                                  | C2                                                    | C1                                                             | C1                                                      |
| <b>Initial particle images (no.)</b>                    | 303,062                                             | 303,062                                               | 303,062                                                        | 303,062                                                 |
| <b>Final particle images (no.)</b>                      | 74,161                                              | 86,954                                                | 67,647                                                         | 74,300                                                  |
| <b>Map resolution (Å)<br/>FSC threshold<br/>(0.143)</b> | 4.7                                                 | 4.2                                                   | 4.9                                                            | 4.9                                                     |
| <b>Map resolution range (Å)</b>                         | 3.1 - 30                                            | 3.1 - 12                                              | 3.1 - 15.7                                                     | 3.1 - 13.9                                              |
| <b>Map sharpening B factor (Å<sup>2</sup>)</b>          | -120.1                                              | -108.7                                                | -153.7                                                         | -154                                                    |

**Table S3. Strains and plasmids used in this study.**

| <b>Yeast strains</b>                                                                          | <b>Reference/Source</b>                       |
|-----------------------------------------------------------------------------------------------|-----------------------------------------------|
| CFY1904: MATa his3-D1 leu2-D0 met15-D0 ura3-D0 Trs130-TAP::HIS3                               | Dharmacon (cat# YSC1178-202232849)            |
| CFY2449: SEY6210.1 Trs85-mNeonGreen::HIS3                                                     | (19)                                          |
| CFY1638: SEY6210.1 ypt31D::KanMX ypt32D::KanMX::NatMX + VSB283                                | (13)                                          |
| CFY1992: SEY6210.5 trs120Δ::HIS3/TRS120                                                       | (13)                                          |
| CFY2148: SEY6210.1 trs120Δ::HIS3 + pCF1285                                                    | This study                                    |
| CFY2451: SEY6210.1 Trs130-mNeonGreen::HIS3                                                    | (21)                                          |
| CFY1993: SEY6210.5 trs130Δ::HIS3/TRS130                                                       | (13)                                          |
| CFY2150: SEY6210.1 trs130Δ::HIS3 + pCF1286                                                    | This study                                    |
| CFY4633: SEY6210.1 trs130Δ::HIS3 + pSB12                                                      | This study                                    |
| CFY4634: SEY6210.1 trs130Δ::HIS3 + pSB13                                                      | This study                                    |
| CFY1681: SEY6210.1 Sec7-6xDsRed::URA3                                                         | (7)                                           |
|                                                                                               |                                               |
| <b>Plasmids</b>                                                                               | <b>Source</b>                                 |
| pGEX-6P-GST-Ypt32-His <sub>7</sub>                                                            | A. Bretscher (Cornell University, Ithaca, NY) |
| pLT77: pRS416-mRFPmars-Ypt1(D124N)-Fis1                                                       | (23)                                          |
| pLT75: pRS415-mRFPmars-Ypt31(D129N)-Fis1                                                      | (23)                                          |
| pSB1 (Ypt31-Ypt1 chimera): pRS415-mRFPmars-Ypt31 <sub>(112RENADD&gt;DRYATS)</sub> -Fis1       | This paper                                    |
| pLT116: pRS415-mNeonGreen-Ypt32                                                               | (23)                                          |
| pSB2: pRS415-mNeonGreen-Ypt32 <sub>(139DE&gt;RK)</sub>                                        | This paper                                    |
| pSB2: pRS415-mNeonGreen-Ypt32(R134A)                                                          | This paper                                    |
| pSB2: pRS415-mNeonGreen-Ypt32(R134A; <sub>139DE&gt;RK</sub> )                                 | This paper                                    |
| pSB2: pRS415-Trs120-mNeonGreen-3XHA                                                           | This paper                                    |
| pSB2 (Trs120(loopIΔ)): pRS415-Trs120(Δ901-910+GSGSG)-mNeonGreen-3XHA                          | This paper                                    |
| pSB3 (Trs120(loopIIΔ)): pRS415-Trs120(Δ901-910+GSGSG)-mNeonGreen-3XHA                         | This paper                                    |
| pSB4 (Trs120(loopIIIΔ)): pRS415-Trs120(Δ1093-1110+GSGS)-mNeonGreen-3XHA                       | This paper                                    |
| pSB5 (Trs120(loopII,IIIΔ)): pRS415-Trs120(Δ901-910+GSGSG; Δ1093-1110+GSGS)-mNeonGreen-3XHA    | This paper                                    |
| pSB6 (Trs120(loopIΔ,II,IIIΔ)): pRS415-Trs120(Δ901-910+GSGSG; Δ1093-1110+GSGS)-mNeonGreen-3XHA | This paper                                    |
| pLT85: pRS415-mRFPmars-Ypt32(D129N)-Fis1                                                      | (23)                                          |
| pSB7: pRS415-mRFPmars-Ypt32(D129N; <sub>139DE&gt;RK</sub> )-Fis1                              | This paper                                    |
| pSB8: pRS415-mNeonGreen-Ypt32(Δ208-215)                                                       | This paper                                    |

|                                                                     |            |
|---------------------------------------------------------------------|------------|
| pSB9: pRS415-mNeonGreen-Ypt32( $\Delta$ 208-215+GSGSSGSG)           | This paper |
| pSB10: pRS415-mRFPmars-Ypt32(D129N; $\Delta$ 208-215)-Fis1          | This paper |
| pSB11: pRS415-mRFPmars-Ypt32(D129N; $\Delta$ 208-215+GSGSSGSG)-Fis1 | This paper |
| pSB12: pRS415-Trs130-mNeonGreen-3XHA                                | This paper |
| pSB13: pRS415-Trs130( $\Delta$ 201-340)-mNeonGreen-3XHA             | This paper |
| VSB283: pRS416-Ypt31                                                | (13)       |
| pCF1286: pRS416-Trs130                                              | This paper |
| pCF1285: pRS416-Trs120                                              | This paper |
| pRS415                                                              | (54)       |
| pRS416                                                              | (54)       |



### **Movie S1. Mechanism of activation of Rab11/Ypt32 by the TRAPPII complex.**

Coloring is the same as in Fig. 1. At the beginning of the movie, a TRAPPII monomer in the closed conformation is viewed from the side. The movie then shows a “morph” transition to the open conformation. In the next stage, GDP-bound Rab11/Ypt32 diffuses into the active site chamber and binds to the catalytic core. The structure then transitions back to the closed conformation, triggering conformational change of Rab11/Ypt32 and GDP release. GTP then binds to Rab11/Ypt32, as the concentration of GTP is significantly higher than the concentration of GDP within cells. GTP-binding triggers another conformational change of Rab11/Ypt32 to its active state. This conformation of Rab11/Ypt32 is incompatible with stable binding to the core. Transition to the open state of TRAPPII enables activated GTP-bound Rab11/Ypt32 to diffuse away from the active site chamber, and this TRAPPII monomer is available for another round of nucleotide exchange. This movie was made using Chimera. Note that morphing transitions are for illustrative purposes and do not necessarily represent the actual conformation transition pathways.

## REFERENCES AND NOTES

1. A.-C. Borchers, L. Langemeyer, C. Ungermann, Who's in control? Principles of Rab GTPase activation in endolysosomal membrane trafficking and beyond. *J. Cell Biol.* **220**, e202105120 (2021).
2. S. R. Pfeffer, Rab GTPases: Master regulators that establish the secretory and endocytic pathways. *Mol. Biol. Cell* **28**, 712–715 (2017).
3. N. Morozova, Y. Liang, A. A. Tokarev, S. H. Chen, R. Cox, J. Andrejic, Z. Lipatova, V. A. Sciorra, S. D. Emr, N. Segev, TRAPP2 subunits are required for the specificity switch of a Ypt-Rab GEF. *Nat. Cell Biol.* **8**, 1263–1269 (2006).
4. X. Cao, N. Ballew, C. Barlowe, Initial docking of ER-derived vesicles requires Uso1p and Ypt1p but is independent of SNARE proteins. *EMBO J.* **17**, 2156–2165 (1998).
5. H. Plutner, A. D. Cox, S. Pind, R. Khosravi-Far, J. R. Bourne, R. Schwaninger, C. J. Der, W. E. Balch, Rab1b regulates vesicular transport between the endoplasmic reticulum and successive Golgi compartments. *J. Cell Biol.* **115**, 31–43 (1991).
6. N. Segev, Mediation of the attachment or fusion step in vesicular transport by the GTP-binding Ypt1 protein. *Science* **252**, 1553–1556 (1991).
7. C. M. McDonold, J. C. Fromme, Four GTPases differentially regulate the Sec7 Arf-GEF to direct traffic at the trans-golgi network. *Dev. Cell* **30**, 759–767 (2014).
8. M. Benli, F. Döring, D. G. Robinson, X. Yang, D. Gallwitz, Two GTPase isoforms, Ypt31p and Ypt32p, are essential for Golgi function in yeast. *EMBO J.* **15**, 6460–6475 (1996).
9. G. Jedd, J. Mulholland, N. Segev, Two new Ypt GTPases are required for exit from the yeast trans-Golgi compartment. *J. Cell Biol.* **137**, 563–580 (1997).
10. T. Welz, J. Wellbourne-Wood, E. Kerkhoff, Orchestration of cell surface proteins by Rab11. *Trends Cell Biol.* **24**, 407–415 (2014).

11. A. Sakaguchi, M. Sato, K. Sato, K. Gengyo-Ando, T. Yorimitsu, J. Nakai, T. Hara, K. Sato, K. Sato, REI-1 is a guanine nucleotide exchange factor regulating RAB-11 localization and function in *C. elegans* embryos. *Dev. Cell* **35**, 211–221 (2015).
12. B. Xiong, V. Bayat, M. Jaiswal, K. Zhang, H. Sandoval, W.-L. Charng, T. Li, G. David, L. Duraine, Y.-Q. Lin, G. G. Neely, S. Yamamoto, H. J. Bellen, Crag is a GEF for Rab11 required for rhodopsin trafficking and maintenance of adult photoreceptor cells. *PLoS Biol.* **10**, e1001438 (2012).
13. V. A. Sciorra, A. Audhya, A. B. Parsons, N. Segev, C. Boone, S. D. Emr, Synthetic genetic array analysis of the PtdIns 4-kinase Pik1p identifies components in a Golgi-specific Ypt31/rab-GTPase signaling pathway. *Mol. Biol. Cell* **16**, 776–793 (2005).
14. C. C. Robinett, M. G. Giansanti, M. Gatti, M. T. Fuller, TRAPP II is required for cleavage furrow ingression and localization of Rab11 in dividing male meiotic cells of *Drosophila*. *J. Cell Sci.* **122**, 4526–4534 (2009).
15. Y. Otsuka, T. Satoh, N. Nakayama, R. Inaba, H. Yamashita, A. K. Satoh, Parcas is the predominant Rab11-GEF for rhodopsin transport in *Drosophila* photoreceptors. *J. Cell Sci.* **132**, jcs231431 (2019).
16. C. M. Klinger, M. J. Klute, J. B. Dacks, Comparative genomic analysis of multi-subunit tethering complexes demonstrates an ancient pan-eukaryotic complement and sculpting in Apicomplexa. *PLOS ONE* **8**, e76278 (2013).
17. F. Riedel, A. Galindo, N. Muschalik, S. Munro, The two TRAPP complexes of metazoans have distinct roles and act on different Rab GTPases. *J. Cell Biol.* **217**, 601–617 (2018).
18. M. A. Lynch-Day, D. Bhandari, S. Menon, J. Huang, H. Cai, C. R. Bartholomew, J. H. Brumell, S. Ferro-Novick, D. J. Klionsky, Trs85 directs a Ypt1 GEF, TRAPP III, to the phagophore to promote autophagy. *Proc. Natl. Acad. Sci. U.S.A.* **107**, 7811–7816 (2010).
19. L. L. Thomas, A. M. N. Joiner, J. C. Fromme, The TRAPP III complex activates the GTPase Ypt1 (Rab1) in the secretory pathway. *J. Cell Biol.* **217**, 283–298 (2018).

20. M. Sacher, N. Shahrzad, H. Kamel, M. P. Milev, TRAPPopathies: An emerging set of disorders linked to variations in the genes encoding transport protein particle (TRAPP)-associated proteins. *Traffic* **20**, 5–26 (2019).
21. L. L. Thomas, J. C. Fromme, GTPase cross talk regulates TRAPP II activation of Rab11 homologues during vesicle biogenesis. *J. Cell Biol.* **215**, 499–513 (2016).
22. Y. Cai, H. F. Chin, D. Lazarova, S. Menon, C. Fu, H. Cai, A. Sclafani, D. W. Rodgers, E. M. De La Cruz, S. Ferro-Novick, K. M. Reinisch, The structural basis for activation of the Rab Ypt1p by the TRAPP membrane-tethering complexes. *Cell* **133**, 1202–1213 (2008).
23. L. L. Thomas, S. A. van der Vegt, J. C. Fromme, A steric gating mechanism dictates the substrate specificity of a Rab-GEF. *Dev. Cell* **48**, 100–114.e9 (2019).
24. Y.-G. Kim, S. Raunser, C. Munger, J. Wagner, Y.-L. Song, M. Cygler, T. Walz, B.-H. Oh, M. Sacher, The architecture of the multisubunit TRAPP I complex suggests a model for vesicle tethering. *Cell* **127**, 817–830 (2006).
25. A. M. Joiner, B. P. Phillips, K. Yugandhar, E. J. Sanford, M. B. Smolka, H. Yu, E. A. Miller, J. C. Fromme, Structural basis of TRAPP III-mediated Rab1 activation. *EMBO J.* **40**, e107607 (2021).
26. A. Galindo, V. J. Planelles-Herrero, G. Degliesposti, S. Munro, Cryo-EM structure of metazoan TRAPP III, the multi-subunit complex that activates the GTPase Rab1. *EMBO J.* **40**, e107608 (2021).
27. M. L. Jenkins, N. J. Harris, U. Dalwadi, K. D. Fleming, D. S. Ziemianowicz, A. Rafiei, E. M. Martin, D. C. Schriemer, C. K. Yip, J. E. Burke, The substrate specificity of the human TRAPP II complex's Rab-guanine nucleotide exchange factor activity. *Commun Biol.* **3**, 735 (2020).
28. C. K. Yip, J. Berscheminski, T. Walz, Molecular architecture of the TRAPP II complex and implications for vesicle tethering. *Nat. Struct. Mol. Biol.* **17**, 1298–1304 (2010).
29. M. Pinar, E. Arias-Palomo, V. de Los Ríos, H. N. Arst Jr, M. A. Peñalva, Characterization of *Aspergillus nidulans* TRAPPs uncovers unprecedented similarities between fungi and metazoans and reveals the modular assembly of TRAPP II. *PLOS Genet.* **15**, e1008557 (2019).

30. C. Choi, M. Davey, C. Schluter, P. Pandher, Y. Fang, L. J. Foster, E. Conibear, Organization and assembly of the TRAPPII complex. *Traffic* **12**, 715–725 (2011).
31. B. Montpetit, E. Conibear, Identification of the novel TRAPP associated protein Tca17. *Traffic* **10**, 713–723 (2009).
32. M. Zong, X.-G. Wu, C. W. L. Chan, M. Y. Choi, H. C. Chan, J. A. Tanner, S. Yu, The adaptor function of TRAPPC2 in mammalian TRAPPs explains TRAPPC2-associated SEDT and TRAPPC9-associated congenital intellectual disability. *PLOS ONE* **6**, e23350 (2011).
33. D. Taussig, Z. Lipatova, J. J. Kim, X. Zhang, N. Segev, Trs20 is required for TRAPP II assembly. *Traffic* **14**, 678–690 (2013).
34. S. Brunet, N. Shahrzad, D. Saint-Dic, H. Dutczak, M. Sacher, A trs20 mutation that mimics an SEDT-causing mutation blocks selective and non-selective autophagy: A model for TRAPP III organization. *Traffic* **14**, 1091–1104 (2013).
35. I. R. Humphreys, J. Pei, M. Baek, A. Krishnakumar, I. Anishchenko, S. Ovchinnikov, J. Zhang, T. J. Ness, S. Banjade, S. R. Bagde, V. G. Stancheva, X.-H. Li, K. Liu, Z. Zheng, D. J. Barrero, U. Roy, J. Kuper, I. S. Fernández, B. Szakal, D. Branzei, J. Rizo, C. Kisker, E. C. Greene, S. Biggins, S. Keeney, E. A. Miller, J. C. Fromme, T. L. Hendrickson, Q. Cong, D. Baker, Computed structures of core eukaryotic protein complexes. *Science* **374**, eabm4805 (2021).
36. M. P. Milev, C. Graziano, D. Karall, W. F. E. Kuper, N. Al-Deri, D. M. Cordelli, T. B. Haack, K. Danhauser, A. Iuso, F. Palombo, T. Pippucci, H. Prokisch, D. Saint-Dic, M. Seri, D. Stanga, G. Cenacchi, K. L. I. van Gassen, J. Zschocke, C. Fauth, J. A. Mayr, M. Sacher, P. M. van Hasselt, Bi-allelic mutations in *TRAPPC2L* result in a neurodevelopmental disorder and have an impact on RAB11 in fibroblasts. *J. Med. Genet.* **55**, 753–764 (2018).
37. A. Sultana, Y. Jin, C. Dregger, E. Franklin, L. S. Weisman, A. R. Khan, The activation cycle of Rab GTPase Ypt32 reveals structural determinants of effector recruitment and GDI binding. *FEBS Lett.* **585**, 3520–3527 (2011).

38. A. Rak, O. Pylypenko, A. Niculae, K. Pyatkov, R. S. Goody, K. Alexandrov, Structure of the Rab7:REP-1 complex: Insights into the mechanism of Rab prenylation and choroideremia disease. *Cell* **117**, 749–760 (2004).
39. H. S. Mohamoud, S. Ahmed, M. Jelani, N. Alrayes, K. Childs, N. Vadgama, M. M. Almramhi, J. Y. Al-Aama, S. Goodbourn, J. Nasir, A missense mutation in TRAPPC6A leads to build-up of the protein, in patients with a neurodevelopmental syndrome and dysmorphic features. *Sci. Rep.* **8**, 2053 (2018).
40. M. C. Bassik, M. Kampmann, R. J. Lebbink, S. Wang, M. Y. Hein, I. Poser, J. Weibezahn, M. A. Horlbeck, S. Chen, M. Mann, A. A. Hyman, E. M. Leproust, M. T. McManus, J. S. Weissman, A systematic mammalian genetic interaction map reveals pathways underlying ricin susceptibility. *Cell* **152**, 909–922 (2013).
41. S. Q. Zheng, E. Palovcak, J.-P. Armache, K. A. Verba, Y. Cheng, D. A. Agard, MotionCor2: Anisotropic correction of beam-induced motion for improved cryo-electron microscopy. *Nat. Methods* **14**, 331–332 (2017).
42. A. Punjani, J. L. Rubinstein, D. J. Fleet, M. A. Brubaker, cryoSPARC: Algorithms for rapid unsupervised cryo-EM structure determination. *Nat. Methods* **14**, 290–296 (2017).
43. J. Zivanov, T. Nakane, B. O. Forsberg, D. Kimanius, W. J. Hagen, E. Lindahl, S. H. Scheres, New tools for automated high-resolution cryo-EM structure determination in RELION-3. *eLife* **7**, e42166 (2018).
44. J. Zivanov, T. Nakane, S. H. W. Scheres, Estimation of high-order aberrations and anisotropic magnification from cryo-EM data sets in -3.1. *IUCrJ.* **7**, 253–267 (2020).
45. T. C. Terwilliger, S. J. Ludtke, R. J. Read, P. D. Adams, P. V. Afonine, Improvement of cryo-EM maps by density modification. *Nat. Methods* **17**, 923–927 (2020).
46. D. Liebschner, P. V. Afonine, M. L. Baker, G. Bunkóczi, V. B. Chen, T. I. Croll, B. Hintze, L. W. Hung, S. Jain, A. J. McCoy, N. W. Moriarty, R. D. Oeffner, B. K. Poon, M. G. Prisant, R. J. Read, J. S. Richardson, D. C. Richardson, M. D. Sammito, O. V. Sobolev, D. H. Stockwell, T. C. Terwilliger, A. G. Urzhumtsev, L. L. Videau, C. J. Williams, P. D. Adams, Macromolecular structure determination using

x-rays, neutrons and electrons: Recent developments in Phenix. *Acta Crystallogr D Struct Biol.* **75**, 861–877 (2019).

47. E. F. Pettersen, T. D. Goddard, C. C. Huang, G. S. Couch, D. M. Greenblatt, E. C. Meng, T. E. Ferrin, UCSF Chimera—A visualization system for exploratory research and analysis. *J. Comput. Chem.* **25**, 1605–1612 (2004).
48. P. Emsley, B. Lohkamp, W. G. Scott, K. Cowtan, Features and development of Coot. *Acta Crystallogr. D Biol. Crystallogr.* **66**, 486–501 (2010).
49. J. Yang, I. Anishchenko, H. Park, Z. Peng, S. Ovchinnikov, D. Baker, Improved protein structure prediction using predicted interresidue orientations. *Proc. Natl. Acad. Sci. U.S.A.* **117**, 1496–1503 (2020).
50. P. V. Afonine, B. P. Klaholz, N. W. Moriarty, B. K. Poon, O. V. Sobolev, T. C. Terwilliger, P. D. Adams, A. Urzhumtsev, New tools for the analysis and validation of cryo-EM maps and atomic models. *Acta Crystallogr. D Struct. Biol.* **74**, 814–840 (2018).
51. A. Morin, B. Eisenbraun, J. Key, P. C. Sanschagrin, M. A. Timony, M. Ottaviano, P. Sliz, Collaboration gets the most out of software. *eLife* **2**, e01456 (2013).
52. H. Ashkenazy, S. Abadi, E. Martz, O. Chay, I. Mayrose, T. Pupko, N. Ben-Tal, ConSurf 2016: An improved methodology to estimate and visualize evolutionary conservation in macromolecules. *Nucleic Acids Res.* **44**, W344–W350 (2016).
53. J. Jumper, R. Evans, A. Pritzel, T. Green, M. Figurnov, O. Ronneberger, K. Tunyasuvunakool, R. Bates, A. Žídek, A. Potapenko, A. Bridgland, C. Meyer, S. A. A. Kohl, A. J. Ballard, A. Cowie, B. Romera-Paredes, S. Nikolov, R. Jain, J. Adler, T. Back, S. Petersen, D. Reiman, E. Clancy, M. Zielinski, M. Steinegger, M. Pacholska, T. Berghammer, S. Bodenstein, D. Silver, O. Vinyals, A. W. Senior, K. Kavukcuoglu, P. Kohli, D. Hassabis, Highly accurate protein structure prediction with AlphaFold. *Nature* **596**, 583–589 (2021).

54. R. S. Sikorski, P. Hieter, A system of shuttle vectors and yeast host strains designed for efficient manipulation of DNA in *Saccharomyces cerevisiae*. *Genetics* **122**, 19–27 (1989).
